# Supplementary material for: Associations Between Physical Health Limitations and Community Participation Among People With and Without Serious Mental Illnesses
Source: Atypon-hosted journal article supplement (doi:10.1176/appi.ps.201800407), 2019-04-23

Online Supplement

Figure S1. Geographic location of study participants

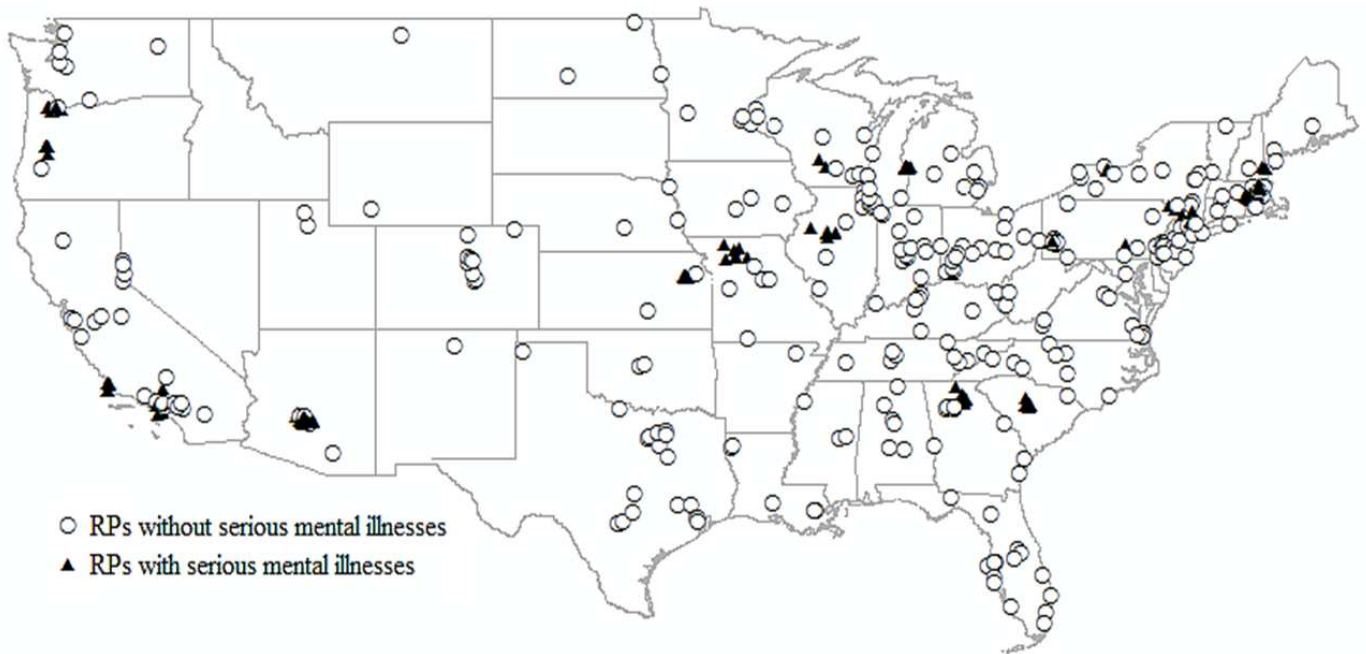

Figure S2. Recruitment diagram for the sample of participants with serious mental illnesses

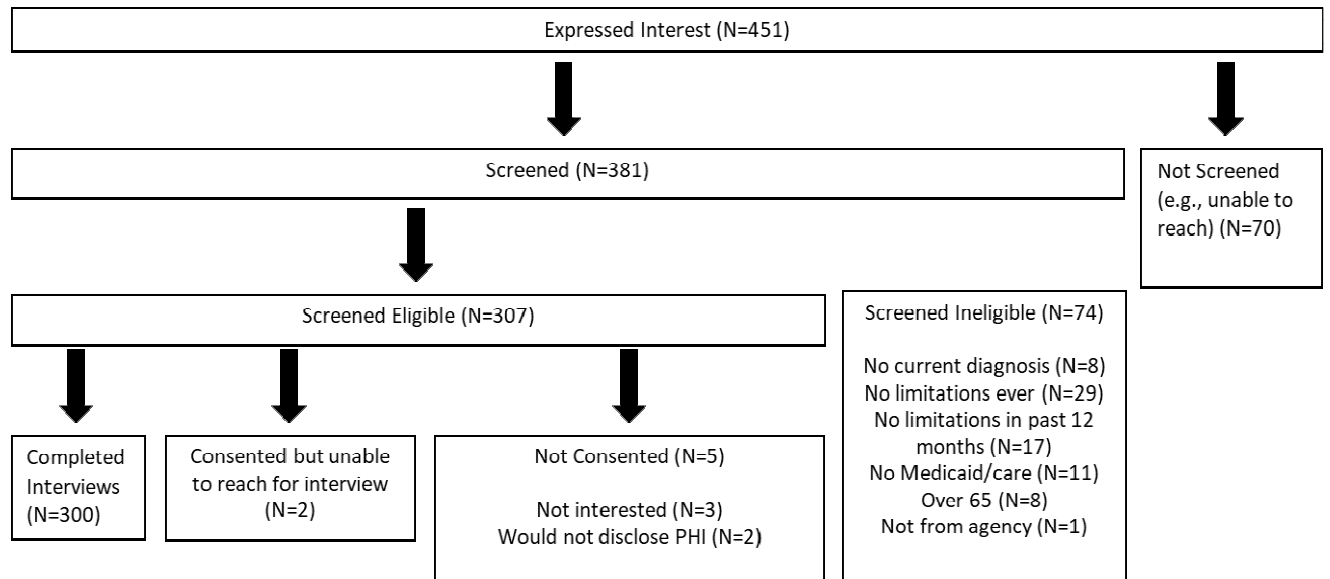

Figure S3. Recruitment diagram for the sample of participants without serious mental illnesses

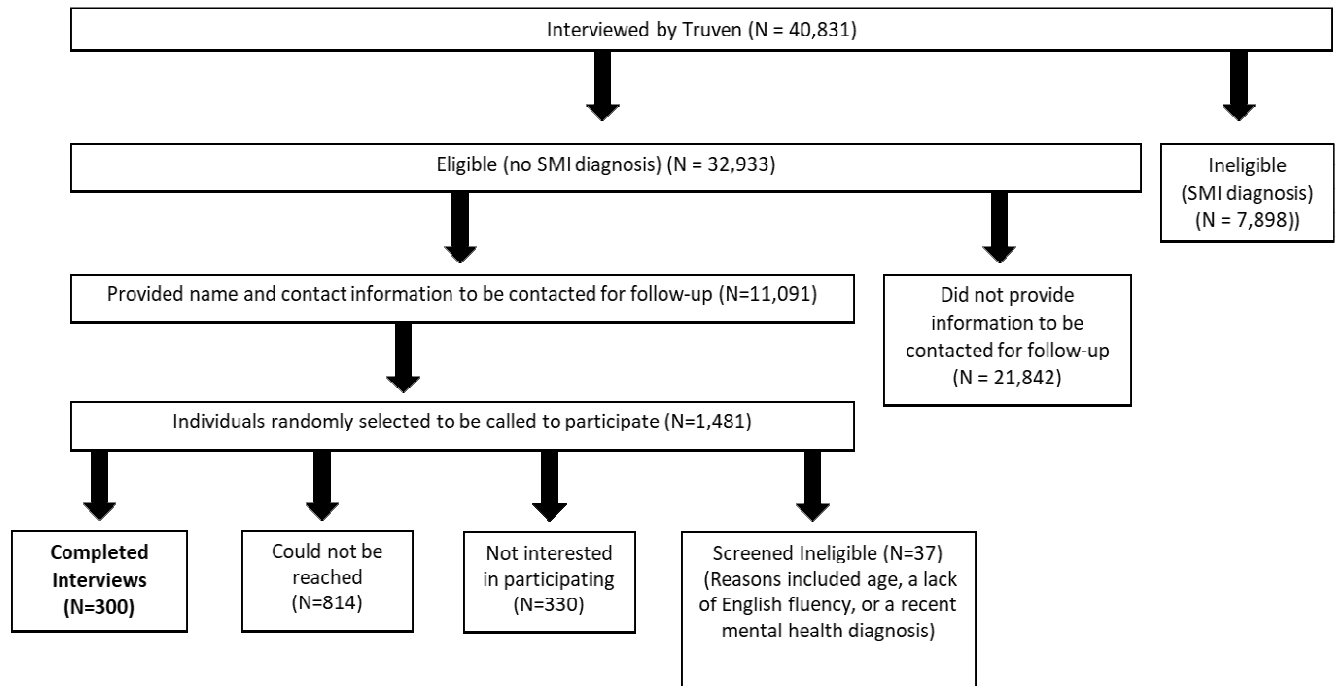

Supplement: appi.ps.201800407.ds001.pdf [file appi.ps.201800407.ds001.pdf]
